# Supplementary material for: Catalytic activity and selectivity of reusable α-MoO3nanobelts toward oxidation of olefins and sulfides using economical peroxides
Source: Royal Society of Chemistry journal article supplement (doi:10.1039/c3ra44404j), 2013-10-05
Supplement: c3ra44404j.pdf [file c3ra44404j.pdf]

## Supporting Information

### Catalytic Activity and Selectivity of Reusable $\alpha$ -MoO<sub>3</sub> nanobelts toward Oxidation of Olefins and Sulfides using Economical Peroxides

Maasoumeh Jafarpour,\* Mahboube Ghahramaninezhad and Abdolreza Rezaeifard\*

Catalysis Research Laboratory, Department of Chemistry, Faculty of Science, University of Birjand,

Birjand, 97179-414 Iran

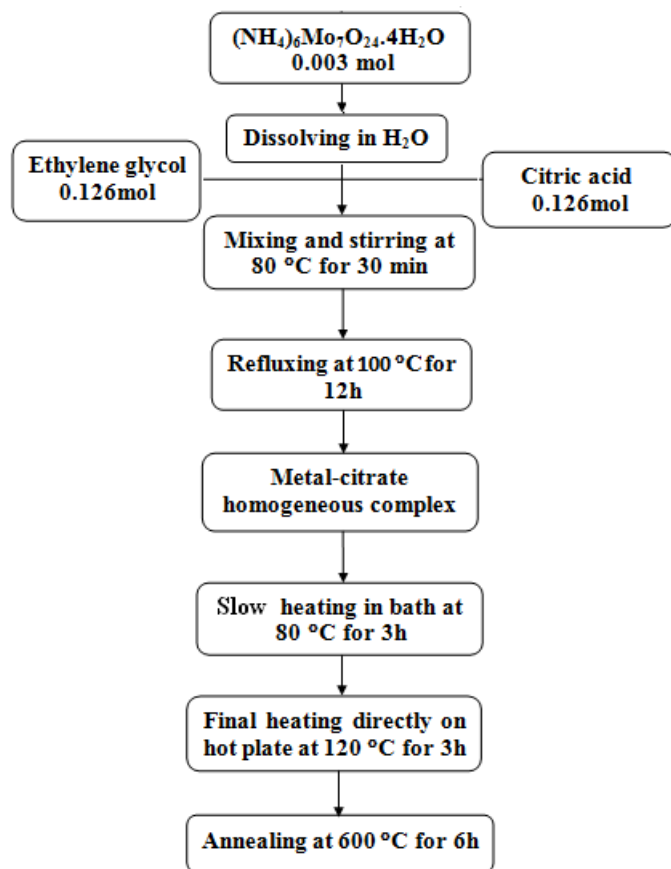

**Figure S1.** The flow chart of preparation of nanobelts of  $\alpha$ -MoO<sub>3</sub> by sol-gel process.

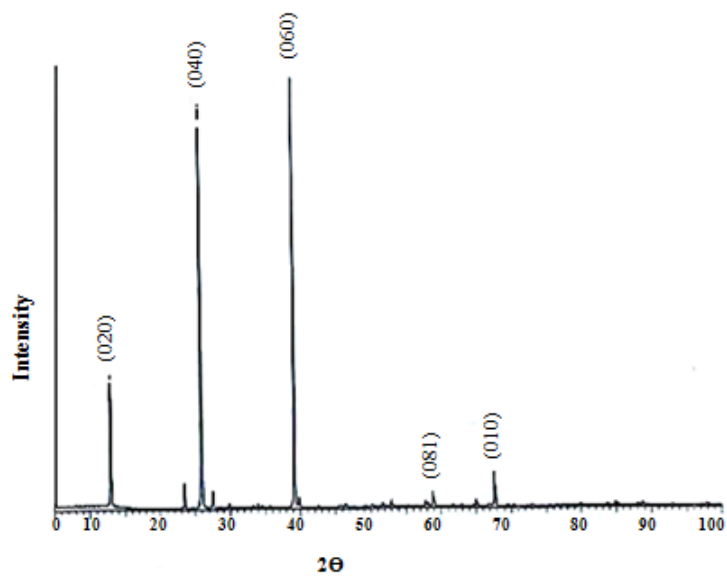

**Figure S2.** XRD pattern of nanobelts of  $\alpha$ -MoO<sub>3</sub>

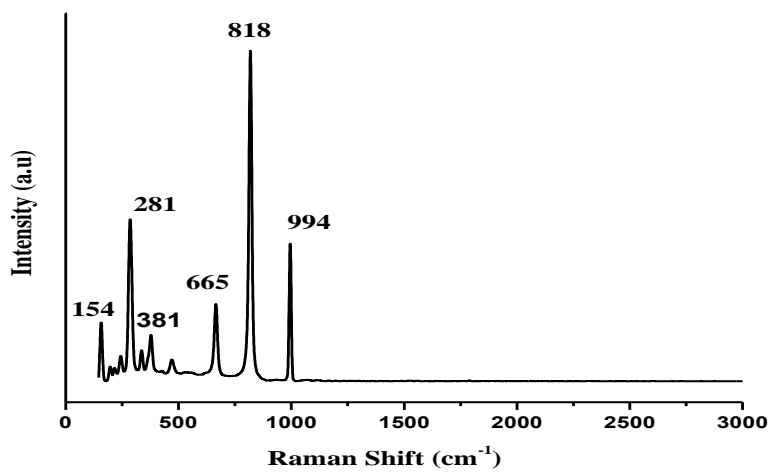

**Figure S3.** Raman spectra of nanobelts of  $\alpha$ -MoO<sub>3</sub>

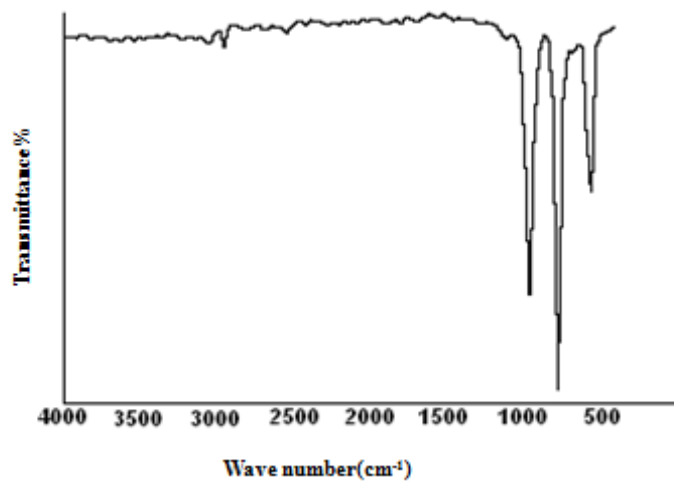

**Figure S4.** FT-IR patterns of nanobelts of  $\alpha$ -MoO<sub>3</sub>

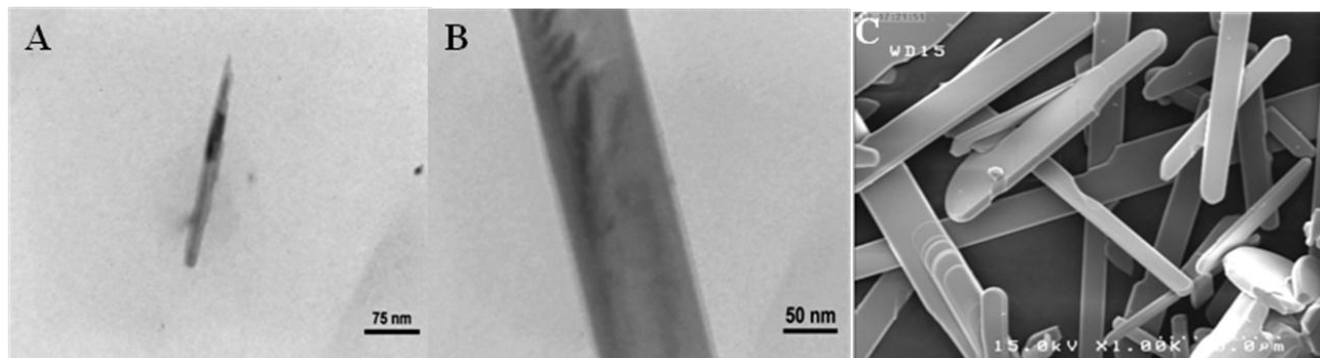

**Figure S5.** HRTEM (A and B) and SEM (C) images of nanobelts of  $\alpha$ -MoO<sub>3</sub>

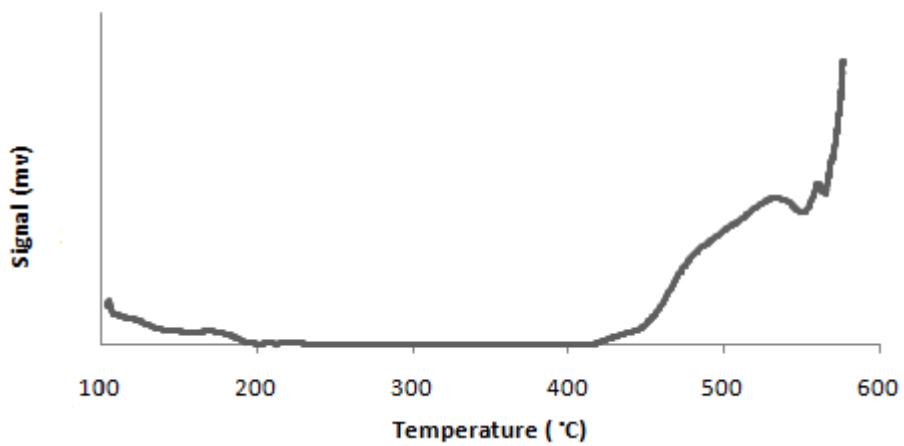

**Figure S6.** The NH<sub>3</sub>-TPD of nanobelts of  $\alpha$ -MoO<sub>3</sub>

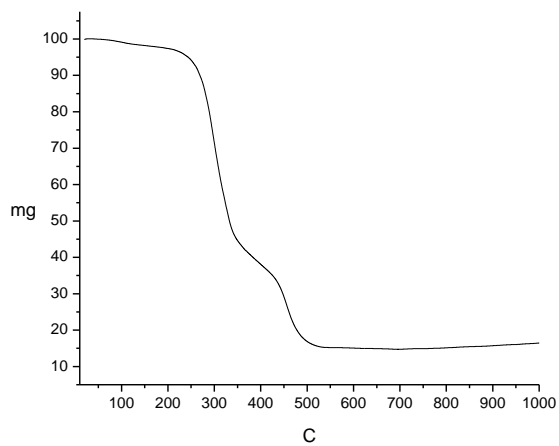

**Figure S7.** The TGA of nanobelts of  $\alpha$ -MoO<sub>3</sub>
